# Supplementary material
Source: PubMed Central journal article supplement (PMC11115860)

**Suppl. figure 1: Confocal analysis of KIF5C colocalization with E-cadherin in MDCK cells.**

(A) TGN-release experiments were performed with polarized MDCK cells as indicated in Fig. 4. Following fixation the cells were immunostained with anti-KIF5C (with Alexa Fluor 488 as secondary antibody) and anti-E-cadherin (with Alexa Fluor 546 as secondary antibody). Colocalized structures are indicated by arrows. At the lower panel xz views are shown. The apical region is depicted as api, the basolateral – as baso. (B) The quantification of overlap coefficients between KIF5C- and E-cadherin-fluorescence from 20 cells for each time point after TGN release is shown. In the merged images KIF5C is depicted in green, E-cadherin in red colour. Scale bars, 10  $\mu\text{m}$ .

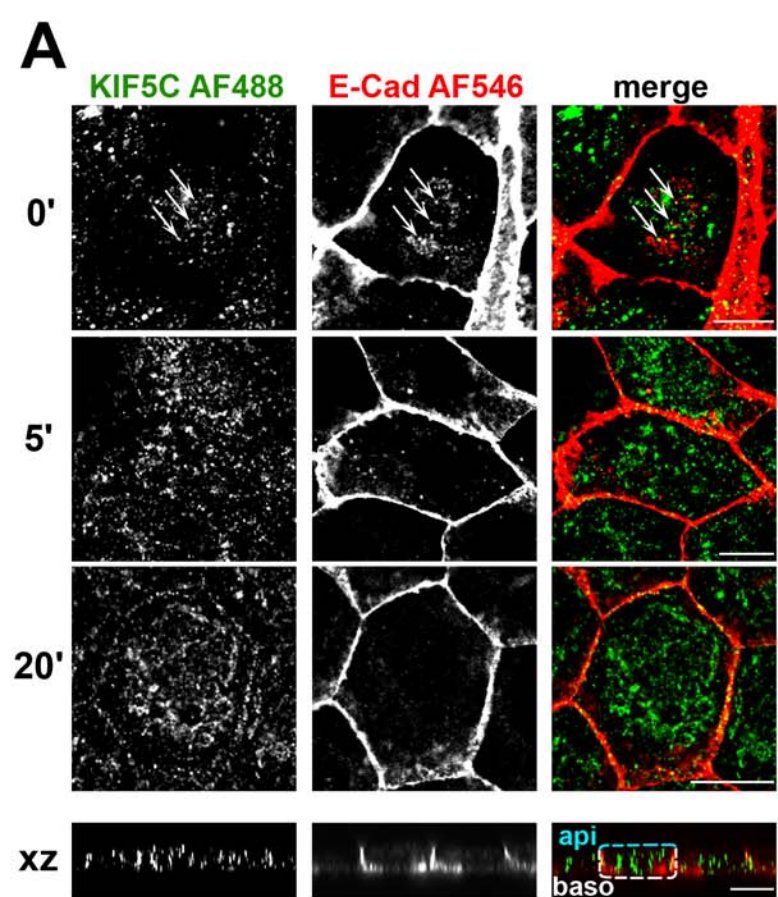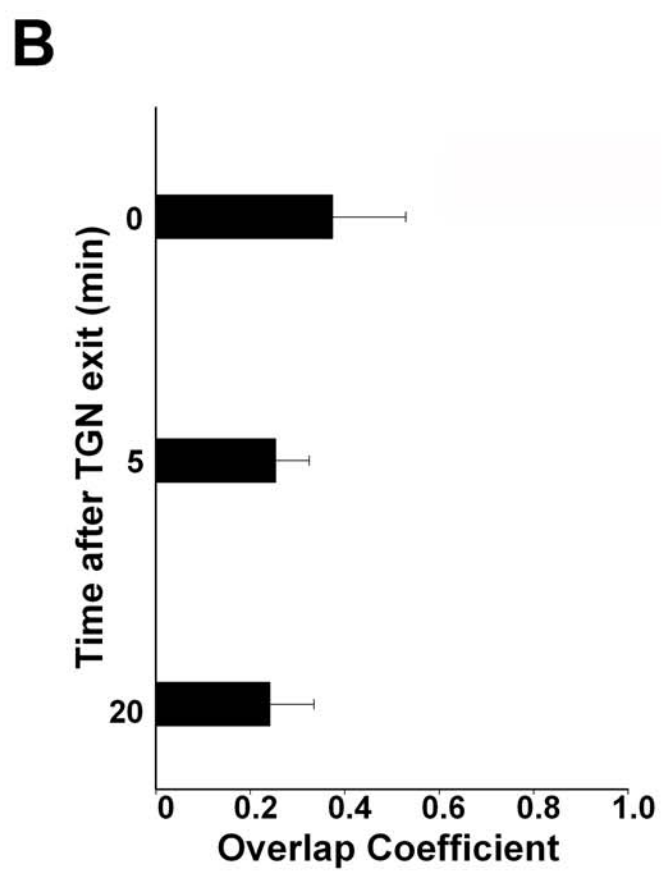

Supplement: 18_2009_253_MOESM1_ESM.pdf [file 18_2009_253_MOESM1_ESM.pdf]
